# Supplementary material
Source: MDPI journal article supplement (https://www.mdpi.com/2227-9040/12/5/83)
Supplement: s1 [file s1]

# Influence of pH on Room-Temperature Synthesis of Zinc Oxide Nanoparticles for Flexible Gas Sensor Applications

Fazia Mechai <sup>1,2,3</sup>, Ahmad Al Shboul <sup>1,\*</sup>, Mohand Outahar Bensidhoum <sup>2,3</sup>, Hossein Anabestani <sup>4</sup>,  
Mohsen Ketabi <sup>1</sup> and Ricardo Izquierdo <sup>1,\*</sup>

<sup>1</sup> Department of Electrical Engineering, École de Technologie Supérieure (ETS), 1100 Notre-Dame St W, Montreal, QC H3C 1K3, Canada; fazia.mechai.1@ens.etsmtl.ca (F.M.); mohsen.ketabi.1@ens.etsmtl.ca (M.K.)

<sup>2</sup> Artificial Vision and Automatic Systems (LVAAS) Laboratory, Mouloud Mammeri University of Tizi-Ouzou (UMMTO), Tizi Ouzou, C1063600 Algeria; mohand-outahar.bensidhoum@ummto.dz (M.O. B.)

<sup>3</sup> Faculty of Electrical and Computer Engineering, Mouloud Mammeri University Tizi-Ouzou (UMMTO), Tizi Ouzou 15000, Algeria

<sup>4</sup> Department of Electrical Engineering, McGill University, 845 Sherbrooke St W, Montreal, QC H3A 0G4, Canada; hossein.anabestani@mail.mcgill.ca (H.A.)

\* Correspondence: ahmad.al-shboul@etsmtl.ca (A.A.S.); ricardo.izquierdo@etsmtl.ca (R.I.)

## Nextronmicroprobe station (Peltier-type sample stage, Seoul, Republic of Korea)

The Nextronmicroprobe station (**Figure S1(A,B)**) with a Peltier-type sample stage, developed in Korea [1], provides a versatile platform for the electrical characterization of samples under controlled temperature, gas, and humidity conditions.

The probe station can accommodate up to six probes made of a rhodium material that can be connected to the sample. The probe station allows for monitoring the sensors' electrical resistance measurements during experiments with a programmed multimeter connected to a PC via an Arduino card. The stage size is typically around 19 mm × 19 mm and made of rhodium-coated copper, which controls heat between −40 °C and + 170 °C with an average ramp speed of up to 60 °C min<sup>−1</sup>. The probe station also offers optional gas dosing and humidity control capabilities during experiments. The humidity control system can be in the normal range between relative humidity (RH) of 4% and 95% and has an average ramp speed of 10% RHmin<sup>−1</sup>. A humidity sensor is installed inside the chambers to monitor RH during experiments. The chamber has gas flow control for precise and stable flow control. The gas flow station, built with the mass flow control unit, gas flow pipeline, and electrical components, is the ideal solution for various applications demanding precise and stable flow control.

The Nextron probe station can generate and control humidity as it is equipped with a humidity control system (HCS). This system consists of a two-channel Mass Flow Controller (MFC) that can precisely control the flow of dry and humid gas into the probe station chamber. The probe station has a humidity sensor installed inside the chamber, allowing the system to monitor and precisely control the humidity levels within the chamber.

The HCS generates humid gas by passing a dry gas, such as nitrogen or air, through a water bubbler or other humidification device (**Figure S1(C)**). This saturates the gas with water vapor, which can then be precisely mixed with the dry gas using the MFC to achieve the desired humidity level. The HCS uses feedback from the humidity sensor to automatically adjust the mixing ratio of dry and humid gas to maintain the target humidity level within the chamber. This allows for the tight control and stabilization of the humidity environment.

**Citation:** Mechai, F.; Al Shboul, A.; Bensidhoum, M.O.; Anabestani, H.; Ketabi, M.; Izquierdo, R. Influence of pH on Room-Temperature Synthesis of Zinc Oxide Nanoparticles for Flexible Gas Sensor Applications. *Chemosensors* **2024**, *12*, 83. <https://doi.org/10.3390/chemosensors12050083>

Received: 31 March 2024

Revised: 3 May 2024

Accepted: 7 May 2024

Published: 21 May 2024

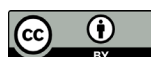

**Copyright:** © 2024 by the authors. Licensee MDPI, Basel, Switzerland. This article is an open access article distributed under the terms and conditions of the Creative Commons Attribution (CC BY) license (<https://creativecommons.org/licenses/by/4.0/>).

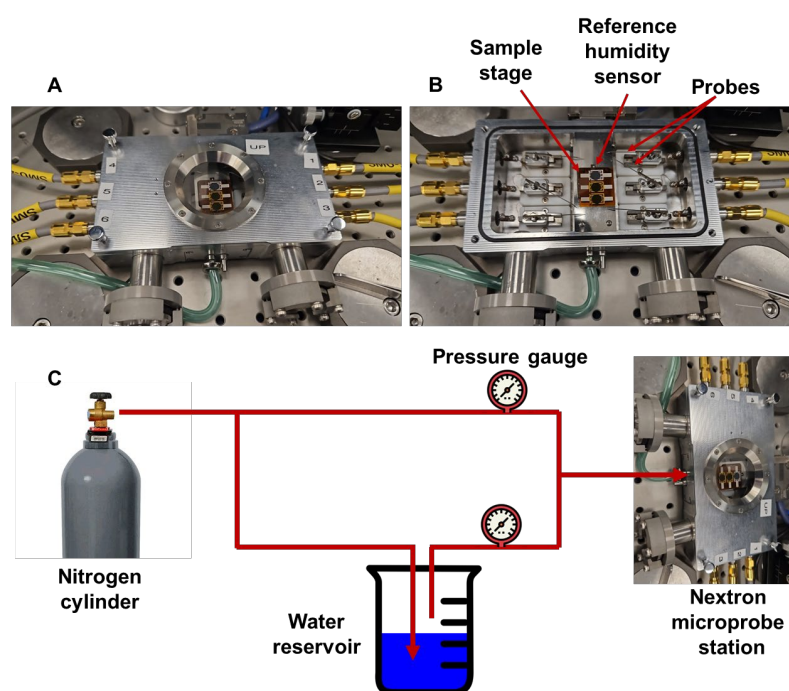

**Figure S1.** (A,B) The Nextronmicroprobe station with a Peltier-type sample stage. (C) Schematic illustration of humidity generation in the Nextron station with the humidity control system (HCS).

### Lab-made organic solvent gas generator

We used a lab-made organic solvent gas generator. Imagine a device comprising a heated flask and a coil submerged in a cooling bath. Inside the flask, a chosen organic solvent awaits its transformation. As the temperature within the flask rises, controlled by a precise heat source, the solvent evaporates. We used mass flow meters to measure the amount of solvent vaporized, ensuring consistent and repeatable experiments. By monitoring the mass flow rate of the vapor leaving the heated flask, we could adjust the heating or cooling parameters to achieve the target concentration. This heated vapor then ascends into a serpentine coil bathed in a coolant. The vapor encounters a resistance by maintaining a precise coolness within the coil. This thermal opposition condenses some vapor into liquid form, effectively concentrating the organic solvent gas stream. The remaining uncondensed vapor, now boasting a heightened purity and a specific concentration thanks to the thermal control, continues its journey to the Nextron chamber.

**Table S1.** Literature overview of recent ZnO NMs employed in the development of gas sensors.

| ZnO morphologies                   | Synthesis technique | Substrate                              | Gas                           | Concentration (ppm) | Operating temperature (°C) | Response | Response time (s) | Recovery time (s) | Ref  |
|------------------------------------|---------------------|----------------------------------------|-------------------------------|---------------------|----------------------------|----------|-------------------|-------------------|------|
| <b>ZnO Nanoparticles</b>           | Co-precipitation    | Glass                                  | NH <sub>3</sub>               | 50                  | RT                         | 7.29     | 46                | 29                | [2]  |
| <b>ZnO:Eu Nanowire</b>             | Electrochemical     | FTO/ glass                             | H <sub>2</sub>                | 100                 | RT                         | 2.1      | 7                 | 42                | [3]  |
| <b>Ni-ZnO Nanorods</b>             | Hydrothermal        | FTO                                    | H <sub>2</sub> S              | 5                   | 250                        | 68.9%    | 75                | 54                | [4]  |
| <b>ZnO/Mn-PY Nanofiber</b>         | Hydrothermal        | Core yarn (PY)                         | NH <sub>3</sub>               | 100                 | RT                         | 13.13    | 64                | 24                | [5]  |
| <b>ZnO Nanoparticles</b>           | Sonication          | Si/SiO <sub>2</sub>                    | CO                            | 40                  | RT                         | 23.7%    | -                 | -                 | [6]  |
| <b>ZnO/LIG Nanorods</b>            | Hydrothermal        | polyimide (PI)                         | NO <sub>2</sub>               | 1                   | RT                         | 251.71%  | 9.5               | 8.3               | [7]  |
| <b>Ag-ZnO/GO Nanorods</b>          | Hydrothermal        | FTO                                    | C <sub>2</sub> H <sub>2</sub> | 100                 | 250                        | 187.34%  | 13                | 780               | [8]  |
| <b>ZnO Nanorods</b>                | CBD                 | SiO <sub>2</sub> /p-Si                 | NH <sub>3</sub>               | 50                  | RT                         | 226%     | 14                | 4                 | [9]  |
| <b>Au-ZnO/Mi Crospheres</b>        | Hydrothermal        | polyimide (PI)                         | Ethanol                       | 100                 | 320                        | 75.185   | -                 | -                 | [10] |
| <b>Pd-ZnO Hexagonal Microdisks</b> | Hydrothermal        | Al <sub>2</sub> O <sub>3</sub> ceramic | NH <sub>3</sub>               | 50                  | 230                        | 3.9      | 23.2              | 271.8             | [11] |

|                                                       |                             |                                       |                |             |    |        |     |     |      |
|-------------------------------------------------------|-----------------------------|---------------------------------------|----------------|-------------|----|--------|-----|-----|------|
| GO/ZnO<br>Thin film                                   | DC reactive<br>sputtering   | Glass                                 | NH3            | 25          | RT | 14.783 | 114 | 21  | [12] |
| ZnO<br>Thin Film                                      | Electron beam<br>deposition | Si and Al <sub>2</sub> O <sub>3</sub> | O <sub>3</sub> | 55–1150 ppb | RT | -      | <2  | <15 | [13] |
| Pt/Pd-decorated<br>WS <sub>2</sub> -ZnO<br>Nanosheets | Atomic layer<br>deposition  | -                                     | Acetone        | 10          | RT | 13.77  | -   | -   | [14] |

**Table S2.** Literature overview of recent procedures to synthesize ZnONMs.

| ZnO Nanostructure | Method                               | Precursor-Salt | Reacting Agent    | pH    | Synthesis Temperature (°C) | Calcination Temperature (°C/hour) | Particle Size (nm) | Band gap Eg(eV) | Applications                     | Ref  |
|-------------------|--------------------------------------|----------------|-------------------|-------|----------------------------|-----------------------------------|--------------------|-----------------|----------------------------------|------|
| Nanoparticles     | Ultrasound / Sol-gel                 | Zinc acetate   | Oxalic acid       | -     | 60                         | 400–700/2                         | 22–30              | 3.269–3.359     | Photocatalytic and antibacterial | [15] |
| Nanorods          | Sol-gel / Hydrothermal               | Zinc acetate   | Ethanolamine HMTA | -     | 60<br>90                   | -                                 | 27.41              | -               | Power generators and sensors     | [16] |
| Nanoparticles     | Sol-gel / Biosynthesis               | Zinc acetate   | NaOH              | -     | 80 – 60                    | 250/4                             | -                  | 3.23 – 3.25     | Photocatalytic and antibacterial | [17] |
| Nanoparticles     | Biosynthesis                         | Zinc acetate   | NaOH              | 10–14 | 90                         | -                                 | 66.47              | 3.33–3.39       | Breast cancer                    | [18] |
| Nanoparticles     | Biosynthesis / Hydrothermal          | Zinc nitrate   | Lemon extract     | 8     | 180                        | 500/4                             | -                  | 3.20            | Photocatalysis and antibiotics   | [19] |
| Nanosheets        | Hydrothermal / Microwave irradiation | Zinc nitrate   | Urea              | -     | 180                        | 500/5                             | 2.32 ± 0.40        | 3.22            | Ethyl sulfide gas sensor         | [20] |
| Nanorods          | Magnetron sputtering                 | Zinc nitrate   | Methenamine       | -     | 95                         | 600/1                             | ~50                | -               | Ethanol gas sensor               | [21] |
| Nanowire          | Drop coating / Hydrothermal          | Zinc nitrate   | HMTA              | -     | 95                         | 400/1                             | -                  | -               | Hydrogen sulfide gas sensor      | [4]  |
| Nanoflowers       | Sonochemical                         | Zinc acetate   | KOH               | -     | RT                         | -                                 | -                  | -               | DNA biosensors                   | [22] |

|                      |                            |               |      |      |       |       |       |      |                                     |      |
|----------------------|----------------------------|---------------|------|------|-------|-------|-------|------|-------------------------------------|------|
| <b>Nanoplatelets</b> | Electrodeposition          | Zinc chloride | KOH  | -    | RT    | -     | 3–6   | 3.11 | Solar cells                         | [23] |
| <b>Nanoflakes</b>    | Hydrothermal               | Zinc nitrate  | HMTA | -    | 110   | 400/2 | 46    | -    | Hydrogen sulfide Gas sensor         | [24] |
| <b>Nanowire</b>      | Electrochemical deposition | Zinc nitrate  | DMAB | 9–11 | 50–80 | 400/1 | -     | 3.27 | Photocatalytic wastewater treatment | [25] |
| <b>Nanowire</b>      | Solvothermal               | Zinc acetate  | NaOH | -    | 150   | -     | 12.96 | 3.18 | Photocatalysis                      | [26] |

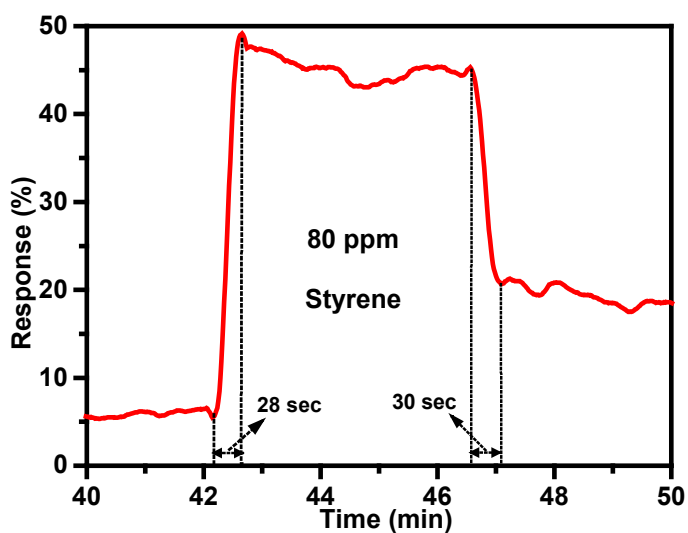

**Figure S2.** The response to an 80 ppm C<sub>8</sub>H<sub>8</sub> gas concentration provides insights into the response and recovery times.

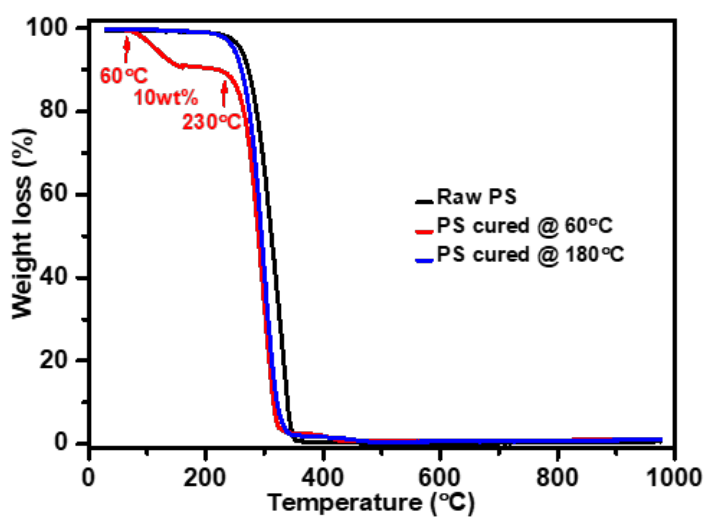

**Figure S3.** TGA thermograms of raw PS, and PS films cured at 60°C and 180°C.

## References

1. Nextron Available online: <https://www.microprobesystem.com> (accessed on 2 May 2024).
2. Himabindu, B.; Latha Devi, N.S.M.P.; Nagaraju, P.; Rajini Kanth, B. A Nanostructured Al-Doped ZnO as an Ultra-Sensitive Room-Temperature Ammonia Gas Sensor. *J Mater Sci: Mater Electron* **2023**, *34*, 1014, <https://doi.org/10.1007/s10854-023-10337-6>.
3. Lupan, C.; Mishra, A.K.; Wolff, N.; Drewes, J.; Krüger, H.; Vahl, A.; Lupan, O.; Pauporté, T.; Viana, B.; Kienle, L.; et al. Nanosensors Based on a Single ZnO: Eu Nanowire for Hydrogen Gas Sensing. *ACS Appl Mater Interfaces* **2022**, *14*, 41196–41207, <https://doi.org/10.1021/acsami.2c10975>.
4. Liu, S.; Yang, W.; Liu, L.; Chen, H.; Liu, Y. Enhanced H<sub>2</sub>S Gas-Sensing Performance of Ni-Doped ZnO Nanowire Arrays. *ACS omega* **2023**, *8*, 7595–7601, <https://doi.org/10.1021/acsomega.2c07092>.
5. Lin, J.-H.; Yang, T.; Zhang, X.; Shiu, B.-C.; Lou, C.-W.; Li, T.-T. Mn-Doped ZnO/SnO<sub>2</sub>-Based Yarn Sensor for Ammonia Detection. *Ceram. Int.* **2023**, *49*, 34431–34439, <https://doi.org/10.1016/j.ceramint.2023.07.222>.
6. Daniel, T.T.; Yadav, V.K.S.; Abraham, E.E.; Paily, R.P. Carbon Monoxide Sensor Based on Printed ZnO. *IEEE Sens. J.* **2022**, *22*, 10910–10917, <https://doi.org/10.1109/JSEN.2022.3166811>.
7. Tseng, S.-F.; Chen, P.-S.; Hsu, S.-H.; Hsiao, W.-T.; Peng, W.-J. Investigation of Fiber Laser-Induced Porous Graphene Electrodes in Controlled Atmospheres for ZnO Nanorod-Based NO<sub>2</sub> Gas Sensors. *Appl. Surf. Sci.* **2023**, *620*, 156847, <https://doi.org/10.1016/j.apsusc.2023.156847>.
8. Kamble, C.; Narwade, S.; Mane, R. Detection of Acetylene (C<sub>2</sub>H<sub>2</sub>) Gas Using Ag-Modified ZnO/GO Nanorods Prepared by a Hydrothermal Synthesis. *Mater. Sci. Semicond. Process.* **2023**, *153*, 107145, <https://doi.org/10.1016/j.mssp.2022.107145>.
9. Kumar, B.B.; Bhowmik, B.; Singh, A.P.; Jit, S.; Singh, K. Room Temperature ZnO Nanorods Based TFT Ammonia Sensor: An Experimental and Simulation Study. *Appl. Phys. A* **2024**, *130*, 308, <https://doi.org/10.1007/s00339-024-07474-y>.
10. Chao, J.; Meng, D.; Zhang, K.; Wang, J.; Guo, L.; Yang, X. Development of an Innovative Ethanol Sensing Sensor Platform Based on the Construction of Au Modified 3D Porous ZnO Hollow Microspheres. *Mater. Research Bull.* **2024**, *170*, 112569, [doi:10.1016/j.materresbull.2023.112569](https://doi.org/10.1016/j.materresbull.2023.112569).
11. Li, Y.; Zhang, B.; Li, J.; Duan, Z.; Yang, Y.; Yuan, Z.; Jiang, Y.; Tai, H. Pd-Decorated ZnO Hexagonal Microdisks for NH<sub>3</sub> Sensor. *Chemosensors* **2024**, *12*, 43. <https://doi.org/10.3390/chemosensors12030043>.
12. Natarajamani, G.S.; Kannan, V.P.; Madanagurusamy, S. Synergistically Enhanced NH<sub>3</sub> Gas Sensing of Graphene Oxide-Decorated Nano-ZnO Thin Films. *Mater. Chem. Phys.* **2024**, 129036, <https://doi.org/10.1016/j.matchemphys.2024.129036>.
13. Bolli, E.; Fornari, A.; Bellucci, A.; Mastellone, M.; Valentini, V.; Mezzi, A.; Polini, R.; Santagata, A.; Trucchi, D.M. Room-Temperature O<sub>3</sub> Detection: Zero-Bias Sensors Based on ZnO Thin Films. *Crystals* **2024**, *14*, 90, <https://doi.org/10.3390/cryst14010090>.
14. Kim, J.-Y.; Mirzaei, A.; Lee, M.H.; Kim, T.-U.; Kim, S.S.; Kim, J.-H. Boosting the Acetone Gas Sensing of WS<sub>2</sub>-ZnO Nanosheets by Codecoration of Pt/Pd Nanoparticles. *J. Alloys Compd.* **2024**, 174325, <https://doi.org/10.1016/j.jallcom.2024.174325>.
15. Nguyen, N.; Nguyen, V. Ultrasound-Assisted Sol-Gel Synthesis, Characterization, and Photocatalytic Application of ZnO Nanoparticles. *Dig. J. Nanomater. Biostruct.* **2023**, *18*, 889–897, <https://doi.org/10.15251/DJNB.2023.183.889>.
16. Torres, F. del C.G.; López, J.L.C.; Rodríguez, A.S.L.; Gallardo, P.S.; Morales, E.R.; Hernández, G.P.; Guillen, J.C.D.; Flores, L.L.D. Sol-Gel/Hydrothermal Synthesis of Well-Aligned ZnO Nanorods. *Bol. Soc. Esp. Ceram. Vidrio* **2023**, *62*, 348–356.
17. Haque, M.J.; Bellah, M.M.; Hassan, M.R.; Rahman, S. Synthesis of ZnO Nanoparticles by Two Different Methods & Comparison of Their Structural, Antibacterial, Photocatalytic and Optical Properties. *Nano Express* **2020**, *1*, 010007, <https://doi.org/10.3390/cryst12081142>.
18. Al Awadh, A.A.; Shet, A.R.; Patil, L.R.; Shaikh, I.A.; Alshahrani, M.M.; Nadaf, R.; Mahnashi, M.H.; Desai, S.V.; Muddapur, U.M.; Achappa, S.; et al. Sustainable Synthesis and Characterization of Zinc Oxide Nanoparticles Using Raphanus Sativus Extract and Its Biomedical Applications. *Crystals* **2022**, *12*, 1142.
19. Batterjee, M.G.; Nabi, A.; Kamli, M.R.; Alzahrani, K.A.; Danish, E.Y.; Malik, M.A. Green Hydrothermal Synthesis of Zinc Oxide Nanoparticles for UV-Light-Induced Photocatalytic Degradation of Ciprofloxacin Antibiotic in an Aqueous Environment. *Catalysts* **2022**, *12*, 1347. <https://doi.org/10.3390/catal12111347>.
20. Lee, M.; Kim, M.Y.; Kim, J.; Park, C.O.; Choa, H.E.; Lee, S.Y.; Park, M.K.; Min, H.; Lee, K.H.; Lee, W. Conductometric Sensor for Gaseous Sulfur-Mustard Simulant by Gold Nanoparticles Anchored on ZnO Nanosheets Prepared via Microwave Irradiation. *Sens. Actuators B: Chem.* **2023**, *386*, 133726, <https://doi.org/10.1016/j.snb.2023.133726>.
21. Yan, P.; Hu, Q.; Chen, J.; Zhou, N.; Zhang, Q. Gas Sensing Property of ZnO NR Arrays Stabilized by High-Temperature Annealing and the Mechanism of Detecting Reduce Gases. *J. Phys. Chem. Solids* **2023**, 111488.
22. Findik, M. ZnO Nanoflowers Modified Pencil Graphite Electrode for Voltammetric DNA Detection and Investigation of Gemcitabine–DNA Interaction. *Mater. Chem. Phys.* **2023**, *307*, 128117, <https://doi.org/10.1016/j.matchemphys.2023.128117>.
23. Ahmad, H.; Naderi, N.; Yasin, M. Design and Photovoltaic Performance Analysis of Electrodeposited ZnO Microspheres/p-Si Heterojunction Energy Harvesters. *J. Mater. Sci. Mater. Electron.* **2023**, *34*, 414, <https://doi.org/10.1007/s10854-023-09851-4>.
24. Nakate, U.T.; Yu, Y.-T.; Park, S. Hydrothermal Synthesis of ZnO Nanoflakes Composed of Fine Nanoparticles for H<sub>2</sub>S Gas Sensing Application. *Ceram. Int.* **2022**, *48*, 28822–28829, <https://doi.org/10.1016/j.ceramint.2022.03.017>.



25. Manzano, C.V.; Philippe, L.; Serrà, A. Recent Progress in the Electrochemical Deposition of ZnO Nanowires: Synthesis Approaches and Applications. *Crit. Reviews. Solid State. Mater. Sci.* **2022**, *47*, 772–805, <https://doi.org/10.1080/10408436.2021.1989663>.
26. Sampath, S.; Rohini, V.; Chinnasamy, K.; Ponnusamy, P.; Thangarasau, S.; Kim, W.K.; Shkir, M.; Maiz, F.; others Solvothermal Synthesis of Magnetically Separable Co–ZnO Nanowires for Visible Light Driven Photocatalytic Applications. *Phys. B Condens. Matter.* **2023**, *652*, 414654, <https://doi.org/10.1016/j.physb.2023.414654>.

**Disclaimer/Publisher’s Note:** The statements, opinions and data contained in all publications are solely those of the individual author(s) and contributor(s) and not of MDPI and/or the editor(s). MDPI and/or the editor(s) disclaim responsibility for any injury to people or property resulting from any ideas, methods, instructions or products referred to in the content.
